# Supplementary material
Source: PubMed Central journal article supplement (PMC4684438)
Supplement: NIHMS729697-supplement-Author_biography_1.pdf [file NIHMS729697-supplement-Author_biography_1.pdf]

### **Anatoly B. Kolomeisky**

Anatoly Kolomeisky has received a MS in Chemistry from Moscow State University, and a PhD in Chemistry in 1998 from Cornell University. After the postdoctoral research work at University of Maryland he joined faculty at the Department of Chemistry at Rice University in 2000. Here he rose to a rank of Professor of Chemistry and Professor of Chemical and Biomolecular Engineering. His current research interest focuses on understanding complex chemical and biological processes using methods of statistical mechanics, including biological and artificial molecular motors, cytoskeleton dynamics, transport through channels, mechanisms of biological signaling, protein-DNA interactions, and protein aggregation.
