# Supplementary material
Source: PubMed Central journal article supplement (PMC4684438)
Supplement: NIHMS729697-supplement-Author_biography_2.pdf [file NIHMS729697-supplement-Author_biography_2.pdf]

## **R. Tyler McLaughlin**

R. Tyler McLaughlin received a BS in Mathematics and a BS in Molecular Biology from the University of Pittsburgh in 2012. His undergraduate research in computational systems biology led him to pursue graduate studies at Rice University's new Systems, Synthetic, and Physical Biology PhD program. A member of the Diehl laboratory, he engineers mammalian cells for precision biophysical analyses of cytoskeletal dynamics, multiple-motor transport, and organelle biogenesis.
