# Supplementary material
Source: PubMed Central journal article supplement (PMC4684438)
Supplement: NIHMS729697-supplement-Author_biography_3.pdf [file NIHMS729697-supplement-Author_biography_3.pdf]

## **Michael R. Diehl**

Michael Diehl received PhD in 2002 in Chemistry from the University of California at Los Angeles. He went on to develop experimental approaches to create and probe the dynamics of interacting systems of motor proteins as a Beckman Fellow at the California Institute of Technology. He joined the faculty at Rice University as an Assistant Professor in 2005 and is now an Associate Professor in the Departments of Chemistry and Bioengineering. His laboratory's research is rooted in the development of synthetic, biophysical and computational approaches to dissect the network-level physiological functions of signaling molecules, mechanochemical enzymes, and cytoskeletal regulatory proteins.
